# Supplementary material for: Modulation of Leptin and Leptin Receptor Expression in Mice Acutely Infected with Neospora caninum
Source: MDPI journal article supplement (doi:10.3390/pathogens9070587), 2020-07-17
Supplement: s1 [file s1]

## Supplementary Materials

# Modulation of Leptin and Leptin Receptor Expression in Mice Acutely Infected with *Neospora caninum*

Luzia Teixeira <sup>1,2,\*</sup>, Alexandra Correia <sup>1,3,4</sup>, Bárbara M. Oliveira <sup>1,2</sup>, Ana Pinto <sup>1,2</sup>,  
Paula G. Ferreira <sup>1,2</sup> and Manuel Vilanova <sup>1,3,4</sup>

<sup>1</sup> ICBAS—Instituto de Ciências Biomédicas Abel Salazar, Universidade do Porto, Rua de Jorge Viterbo Ferreira, 228, 4050-313 Porto, Portugal; alexandra.correia@ibmc.up.pt (A.C.); bmnoliveira@icbas.up.pt (B.M.O.); arpinto@icbas.up.pt (A.P.); pferreir@icbas.up.pt (P.G.F.); vilanova@icbas.up.pt (M.V.)

<sup>2</sup> UMIB—Unidade Multidisciplinar de Investigação Biomédica, Universidade do Porto, Rua de Jorge Viterbo Ferreira, 228, 4050-313 Porto, Portugal

<sup>3</sup> i3S-Instituto de Investigação e Inovação em Saúde, Universidade do Porto, Rua Alfredo Allen, 208, 4200-135 Porto, Portugal

<sup>4</sup> IBMC—Instituto de Biologia Molecular e Celular, Universidade do Porto, Rua Alfredo Allen, 208, 4200-135 Porto, Portugal

\* Correspondence: lmteixeira@icbas.up.pt; (+351) 220428109

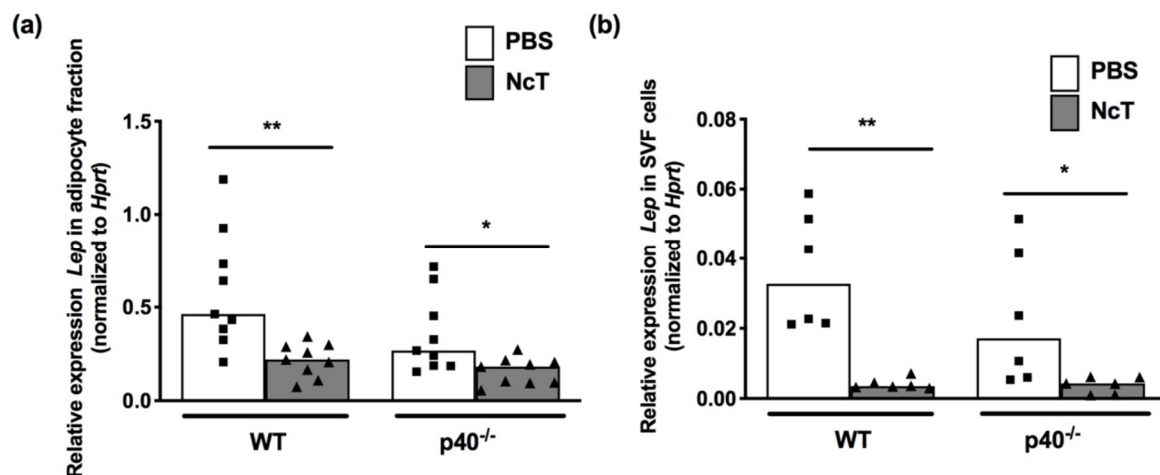

**Figure S1.** Decreased expression of leptin in the adipose tissue of infected mice. Relative levels of leptin (*Lep*) mRNA normalized to hypoxanthine guanine phosphoribosyl transferase (*Hprt*) mRNA, detected by real-time PCR in the (a) adipocyte fraction or (b) stromal vascular fraction (SVF) cells of mesenteric adipose tissue of wild-type (WT) and IL-12/IL-23 p40-deficient (p40<sup>-/-</sup>) mice 24 hours after intraperitoneal administration of 1 × 10<sup>7</sup> *N. caninum* tachyzoites (NcT) or PBS. Bars represent the median values of (a) nine mice or (b) six mice per group, with each individual mouse being represented by a symbol. Results are pooled from (a) three independent experiments or (b) two independent experiments, with three mice per group per experiment. Statistically significant differences between *N. caninum*-challenged and respective control groups are indicated (Mann-Whitney test, \**P* < 0.05; \*\**P* ≤ 0.01).

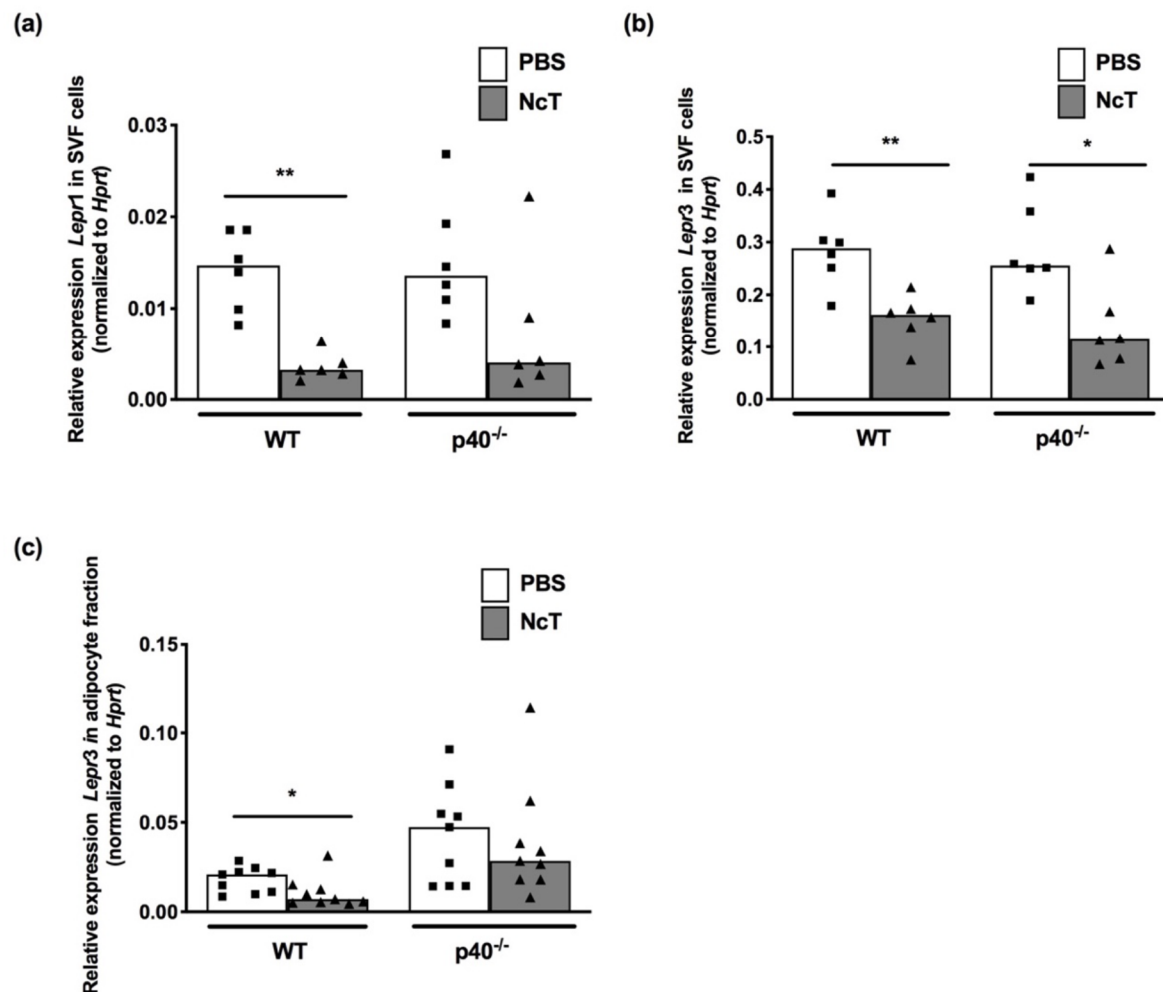

**Figure S2.** Decreased expression of leptin receptor in the adipose tissue of *Neospora caninum* infected mice. (a) Relative levels of leptin receptor transcript variant 1 (*Lepr1*). mRNA and (b) leptin receptor transcript variant 3 (*Lepr3*). mRNA, normalized to hypoxanthine guanine phosphoribosyl transferase (*Hprt*) mRNA, detected by real-time PCR in stromal vascular fraction. (SVF) cells of mesenteric adipose tissue of wild-type (WT) and IL-12/IL-23 p40-deficient (p40<sup>-/-</sup>) mice. 24 h after intraperitoneal administration of  $1 \times 10^7$  *N. caninum* tachyzoites (NcT) or PBS, as indicated. Bars represent the median values of six mice per group, with each individual mouse being represented by a symbol. These are pooled results from two independent experiments with three mice per group per experiment. (c) Relative levels of leptin receptor transcript variant 3 (*Lepr3*). mRNA, normalized to hypoxanthine guanine phosphoribosyl transferase (*Hprt*) mRNA, detected by real-time PCR in adipocyte fraction of mesenteric adipose tissue of wild-type (WT) and IL-12/IL-23 p40-deficient (p40<sup>-/-</sup>) mice 24 hours after intraperitoneal administration of  $1 \times 10^7$  *N. caninum* tachyzoites (NcT) or PBS, as indicated. Bars represent the median values of nine mice per group, with each individual mouse being represented by a symbol. These are pooled results from three independent experiments with three mice per group per experiment. Statistically significant differences between *N. caninum*-challenged and respective control groups are indicated (Mann-Whitney test, \* $P < 0.05$ ; \*\* $P \leq 0.01$ ).

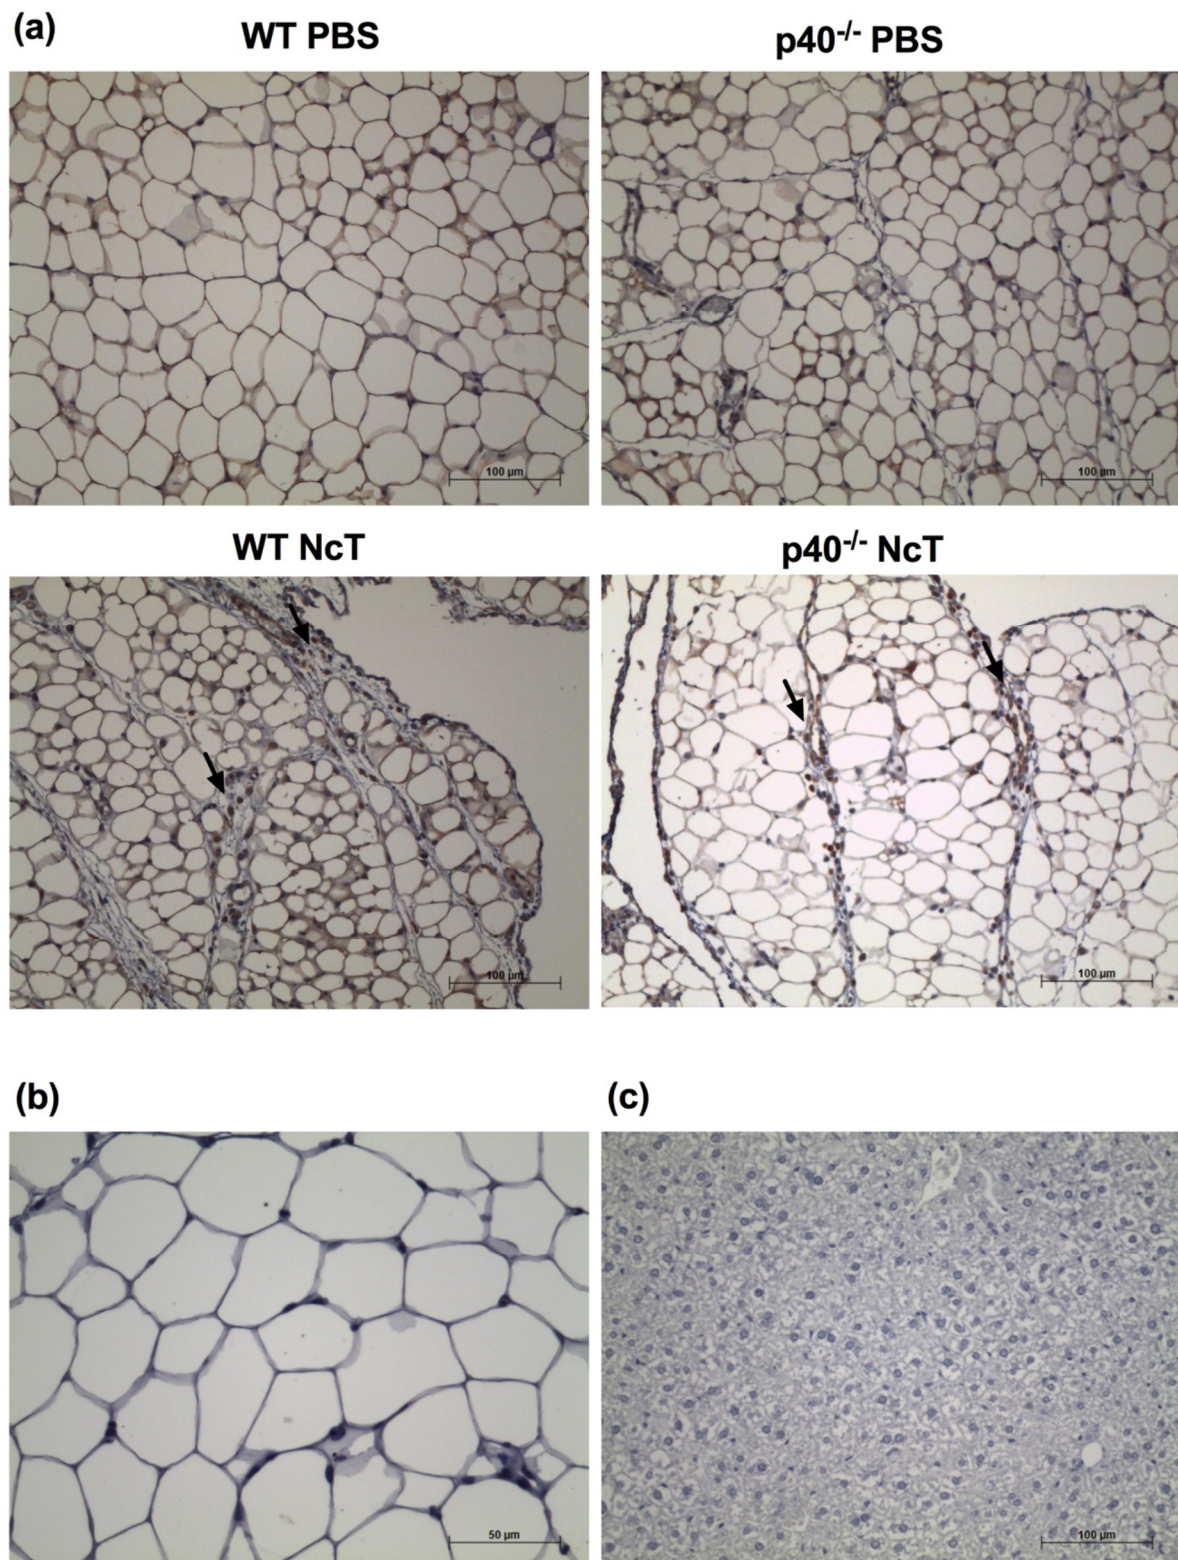

**Figure S3.** Staining for leptin in the adipose tissue of *Neospora caninum* infected mice. **(a)** Representative images of leptin detected by immunohistochemistry in gonadal adipose tissue of wild-type (WT) and IL-12/IL-23 p40-deficient (p40<sup>-/-</sup>) mice 24h after intraperitoneal administration of  $1 \times 10^7$  *N. caninum* tachyzoites (NcT) or PBS. Adipose tissue was specifically stained (brown coloration) with a polyclonal anti-mouse leptin antibody and counterstained with haematoxylin. Bar = 100 µm. These are illustrative examples of two independent experiments with n = 3 per group. Sections of **(b)** adipose tissue or **(c)** liver incubated with PBS instead of the polyclonal anti-mouse leptin antibody (negative control). Bar = 50 µm in **(b)** or 100 µm in **(c)**.



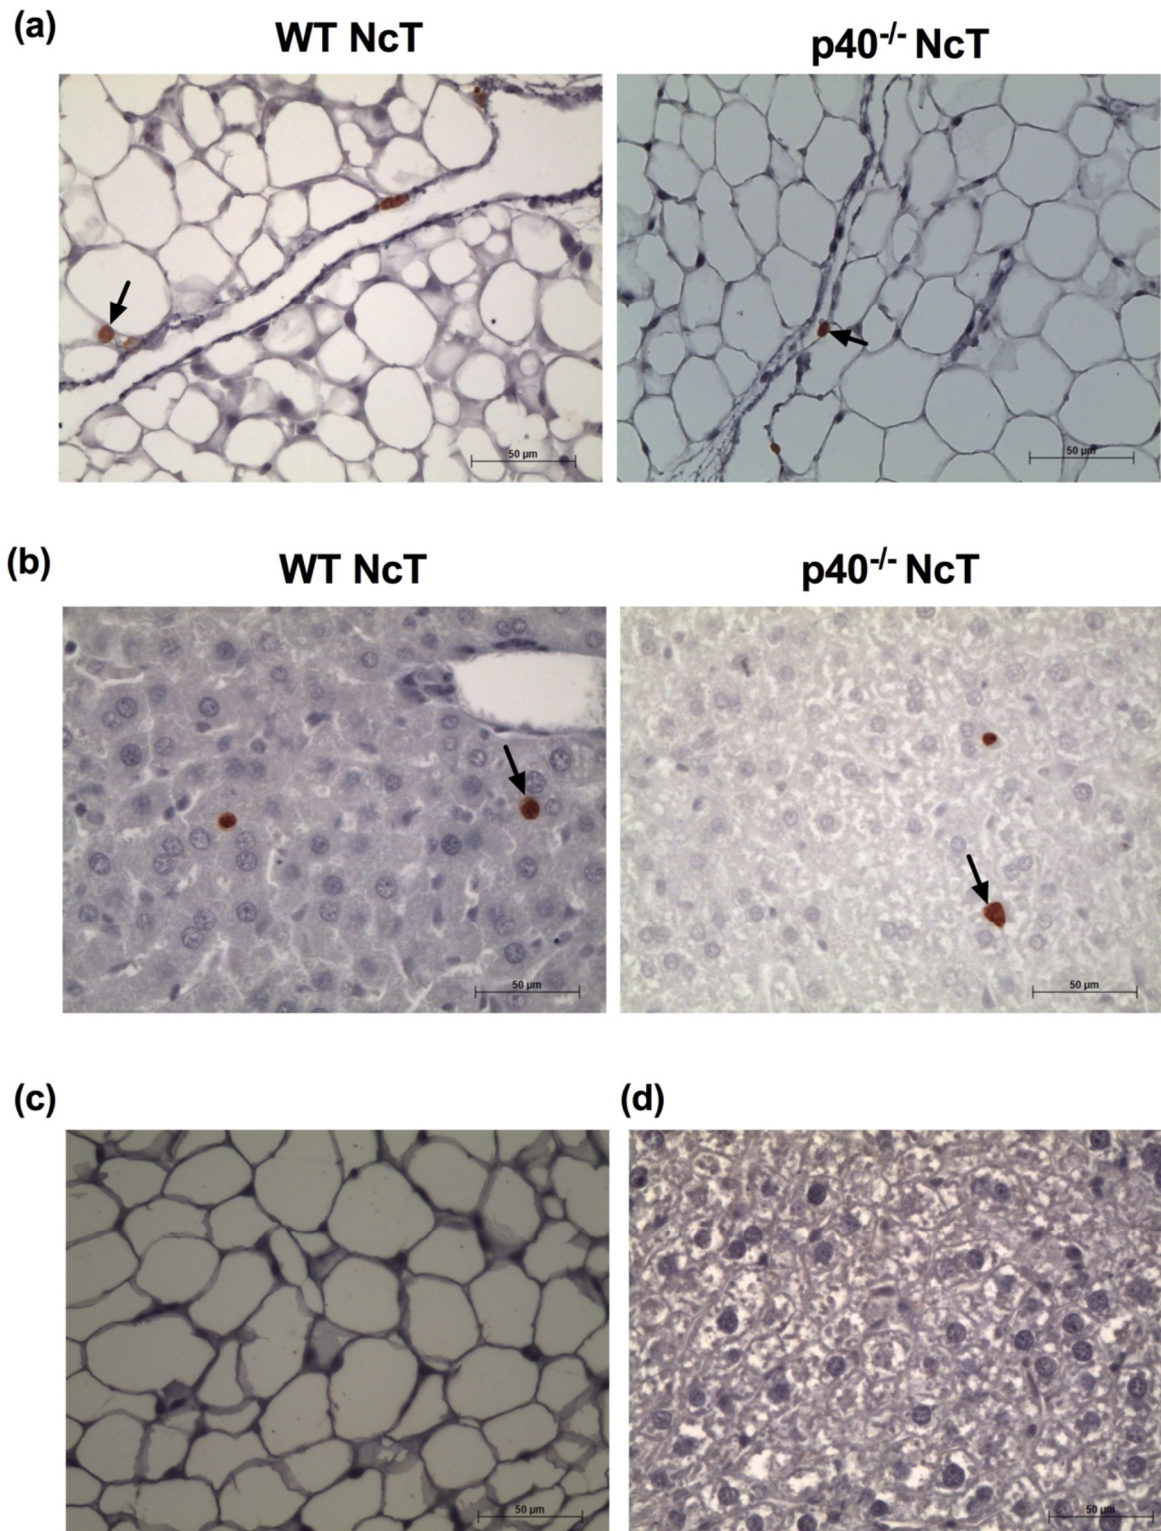

**Figure S4.** Detection of *N. caninum* in gonadal adipose tissue and liver of infected wild-type and IL-12/IL-23 p40-deficient C57BL/6 mice. Representative images showing parasitic forms in (a) gonadal adipose tissue and (b) liver of wild-type (WT) or IL-12/IL-23 p40-deficient (p40<sup>-/-</sup>) C57BL/6 mice 24h after administration of 1 × 10<sup>7</sup> *N. caninum* tachyzoites (NcT), detected by immunohistochemistry. Sections of adipose tissue and liver were specifically stained (brown coloration, indicated by arrows) with a polyclonal anti-*N. caninum* serum and counterstained with haematoxylin. This is one representative result of two independent experiments with three mice per group per experiment. Sections of (c) adipose tissue or (d) liver of a WT non-infected mice (negative control). Bar = 50 µm in all micrographs.



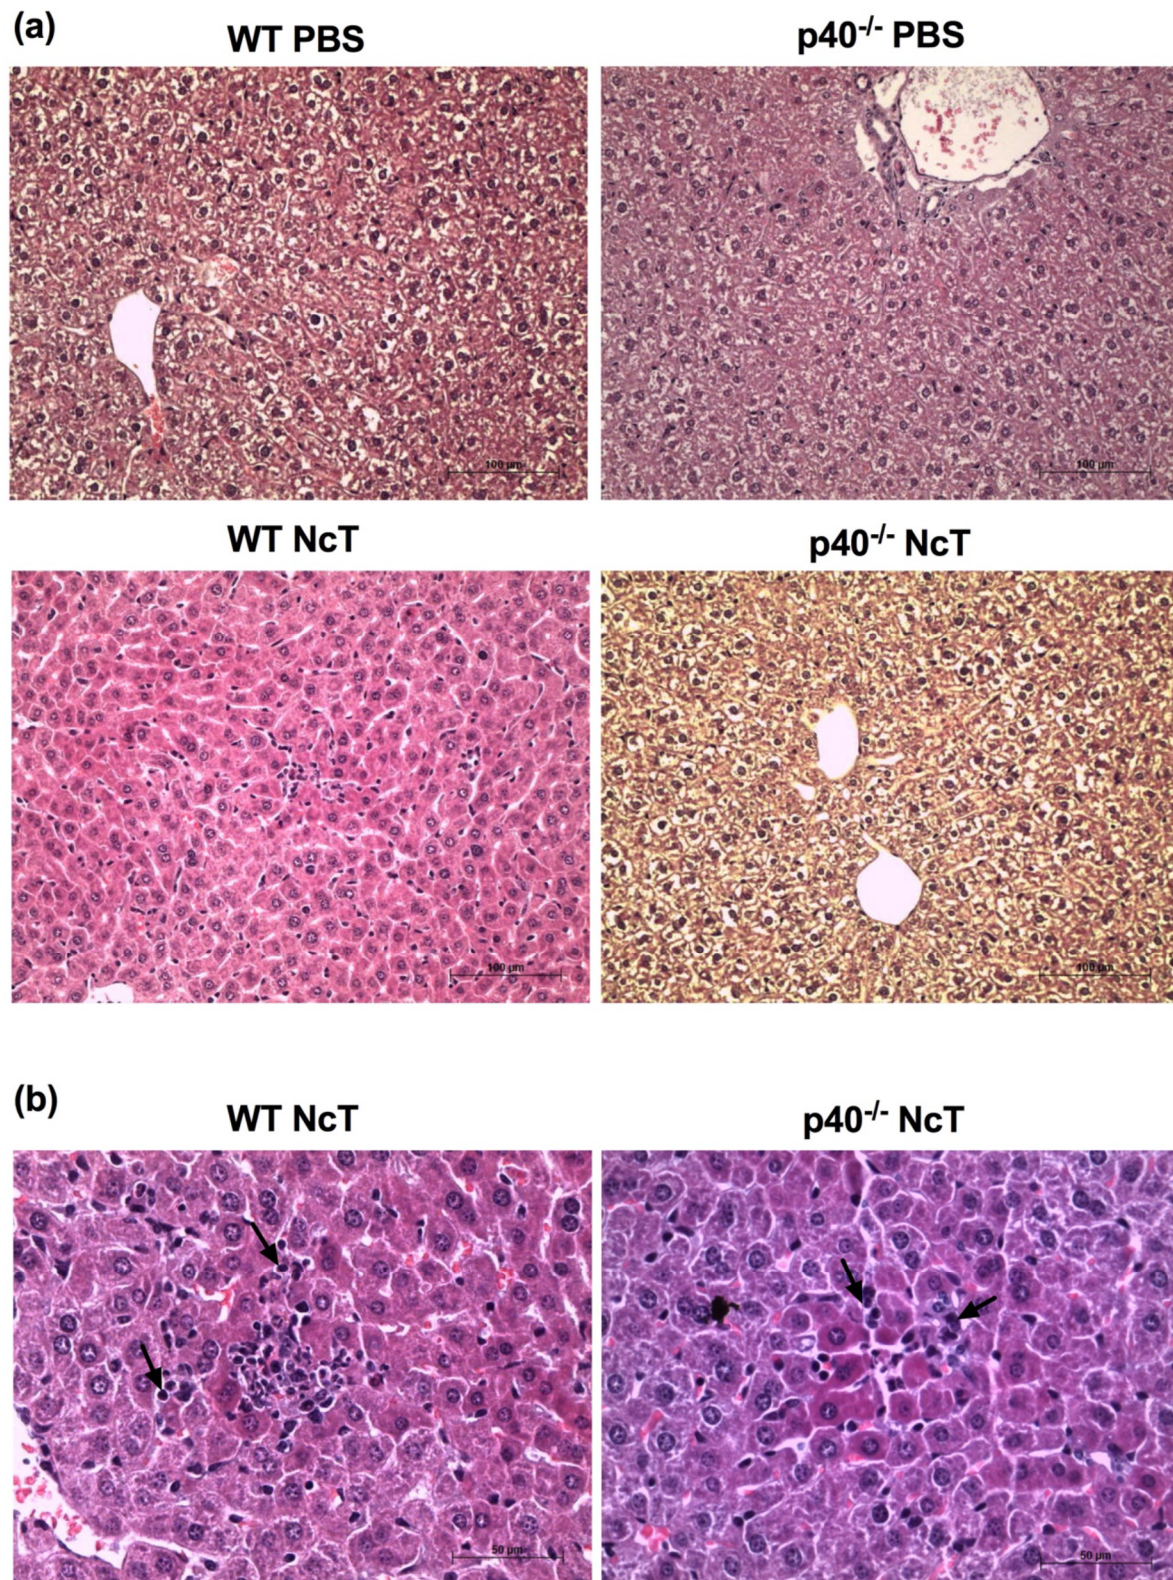

**Figure S5.** Histopathological analysis of liver sections of *Neospora caninum* infected mice. Micrographs of haematoxylin-eosin-stained liver sections of wild-type (WT) and IL-12/IL-23 p40-deficient (p40<sup>-/-</sup>) C57BL/6 mice 24h after intraperitoneal administration of  $1 \times 10^7$  *N. caninum* tachyzoites (NcT) or PBS, as indicated. (a) Cellular infiltrates are evident in the liver of infected WT mice. In infected p40<sup>-/-</sup> mice cellular infiltrates are more difficult to observe. (b) Higher magnification of small foci of hepatic necrosis rarely seen in infected WT and scarcely observed in p40<sup>-/-</sup> infected mice. Inflammatory cells were observed not only in necrosis foci but also inside the 7

sinusoids (arrows). This is one representative result of two independent experiments with three mice per group per experiment.
